# Supplementary material
Source: Springer Nature journal article supplement (https://www.springerprofessional.de/resource/supplementary/13638_2014_1000_MOESM10_ESM.pdf/11898982)

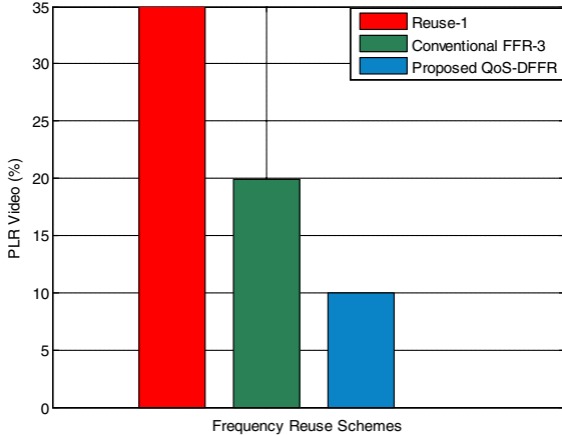

(a)

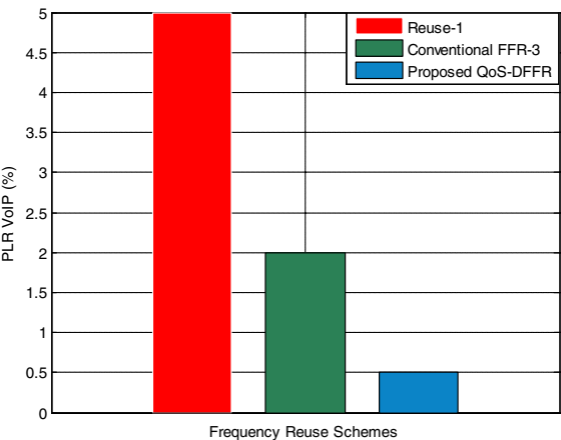

(b)

Supplement: MOESM10 [file 11898982]
